# Supplementary material for: Effect of a Comprehensive Cardiovascular Risk Reduction Intervention in Persons With Serious Mental Illness: A Randomized Clinical Trial
Source: PubMed Central journal article supplement (PMC7293000; doi:10.1001/jamanetworkopen.2020.7247), 2020-06-12
Supplement: jamanetwopen-3-e207247-s002.pdf [file jamanetwopen-3-e207247-s002.pdf]

## Supplementary Online Content

Daumit GL, Dalcin AT, Dickerson FB, et al. Effect of a comprehensive cardiovascular risk reduction intervention in persons with serious mental illness: a randomized clinical trial. *JAMA Netw Open*. 2020;3(6):e207247. doi:10.1001/jamanetworkopen.2020.7247

**eAppendix.** Synopsis of Intervention

**eTable 1.** Trial Enrollment Criteria

**eTable 2.** Global Framingham Risk Score by Randomized Group at Each Visit (Cross-Sectional) and Model-Based Percent Longitudinal Change of Global Framingham Risk Score Over Time

**eFigure 1.** Percent Change in ACC/AHA Risk Score Over Time According to Study Group

**eTable 3.** ACC/AHA Risk Score by Randomized Group at Each Visit and Model-Based Percent Longitudinal Change of ACC/AHA Risk Score Over Time

**eFigure 2.** Model-Based Percent Change in Global Framingham Risk Score by Subgroups of Sex, Race, Cardiovascular Risk at Baseline, and Psychiatric Diagnosis

**eTable 4.** Overnight Hospitalizations, Deaths and Medical Events for Intervention and Control Participants

This supplementary material has been provided by the authors to give readers additional information about their work.

**IDEAL Health Coaching Tracks with Behavioral Counseling Session Topics**

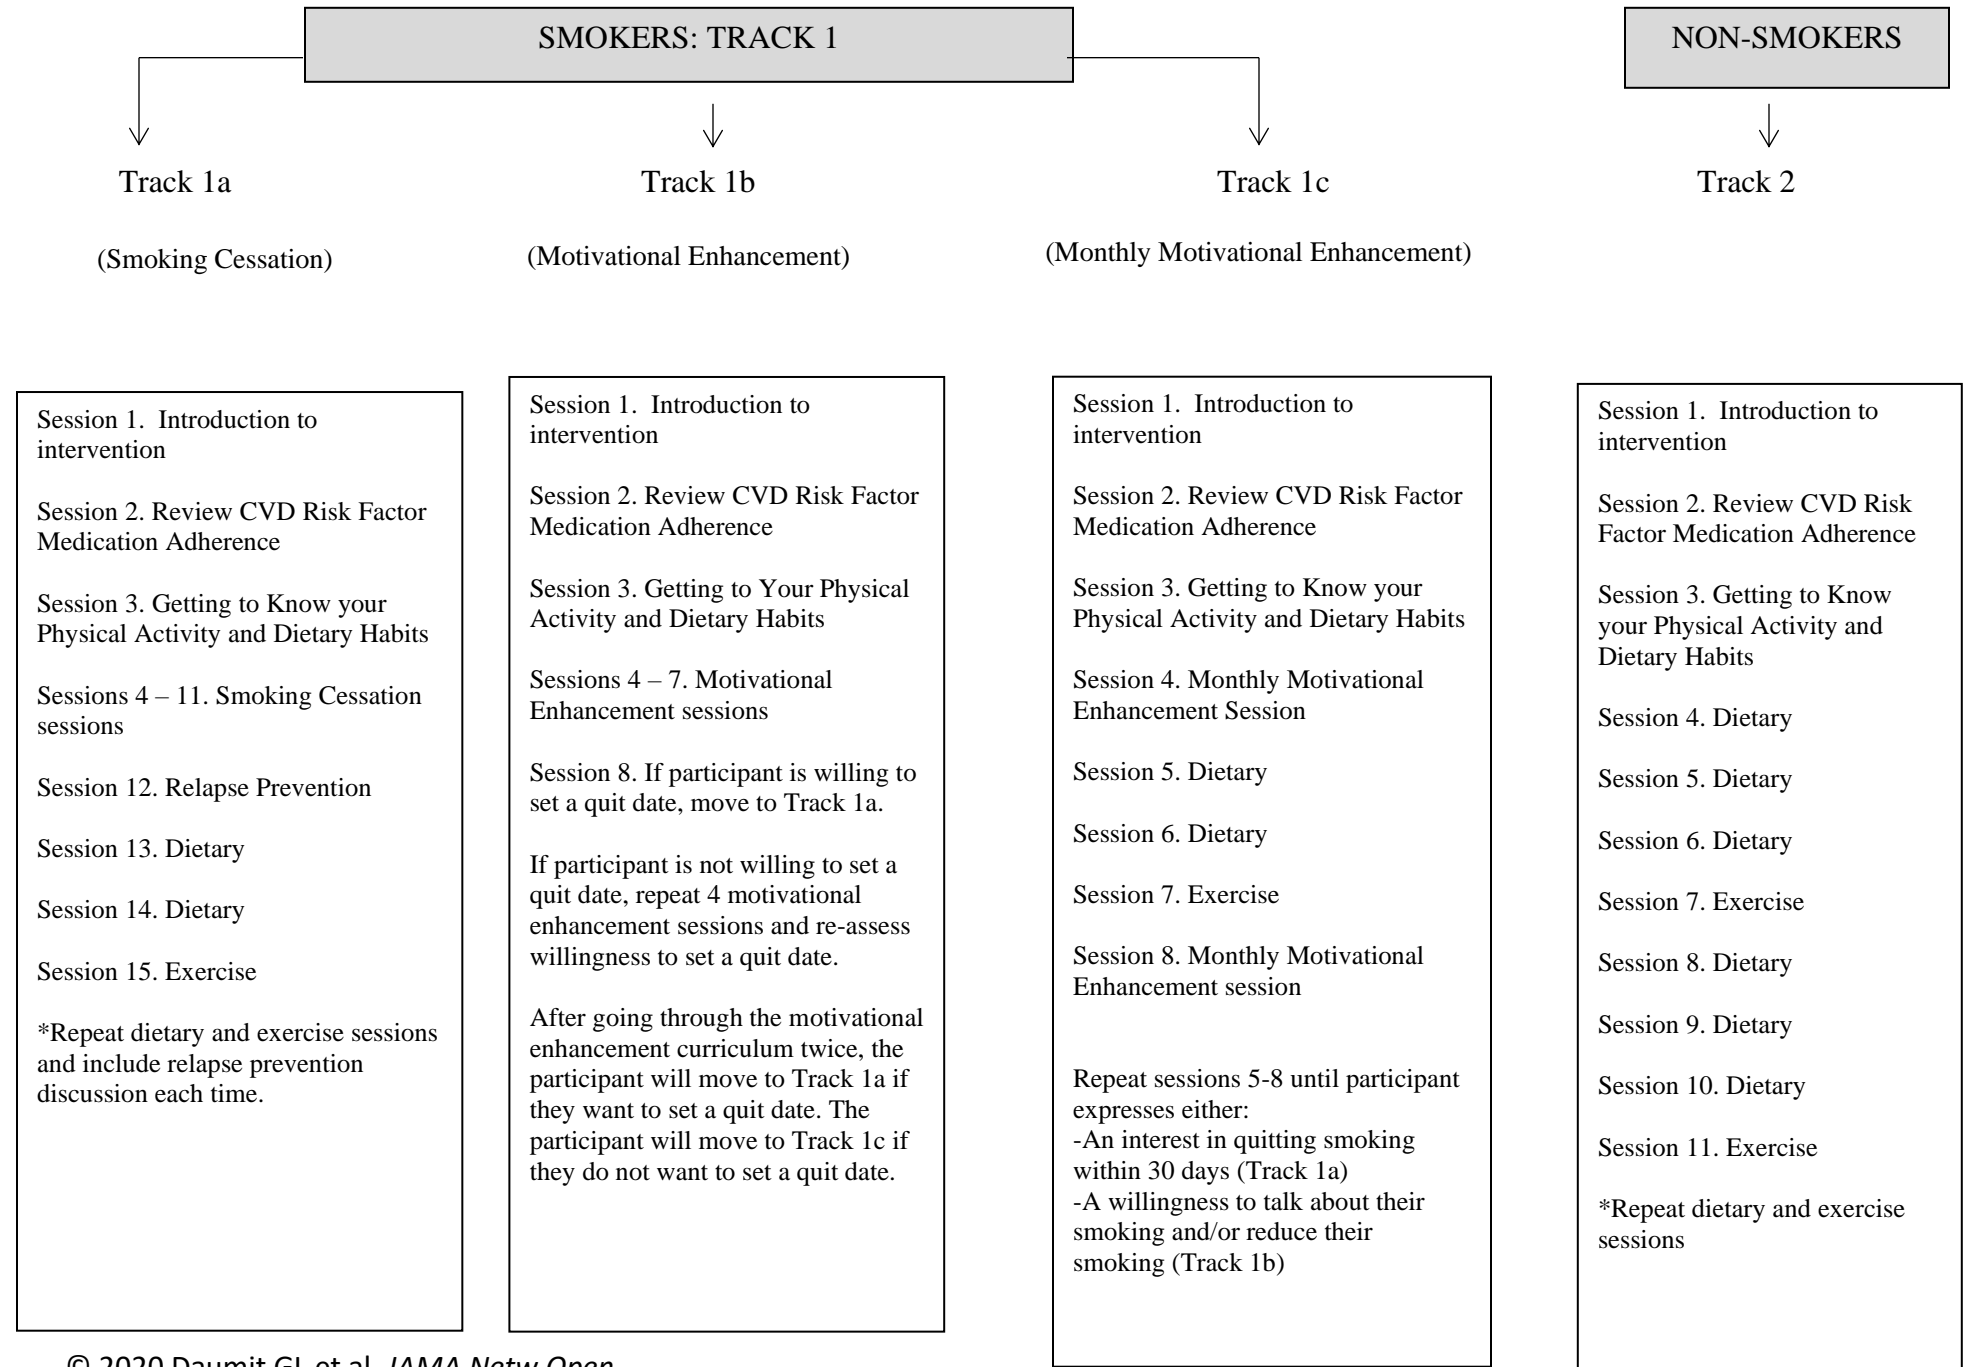

## Sample Health Coach Behavioral Counseling Session Flow

|   |                                                                                                                                                                                               |         |
|---|-----------------------------------------------------------------------------------------------------------------------------------------------------------------------------------------------|---------|
| 1 | Set the stage and establish rapport<br>Welcome participant to session and review agenda                                                                                                       | 1-2 min |
| 2 | Collect intervention data<br>Weight<br>For smokers, smokelyzer depending on readiness to quit                                                                                                 | 1-2 min |
| 3 | Review content and goal from previous session<br>Brief review of material covered during previous session<br>Discuss goal, successes and challenges, including exercise. Highlight successes. | 3-5 min |
| 4 | Discuss session topic<br>Smoking, dietary and/or exercise focus                                                                                                                               | 3-5 min |
| 5 | Set goal and action plan*<br>Develop a specific and attainable behavioral goal and strategize ways for participant to be successful (what they need to do to accomplish their goal)           | 3-5 min |
| 6 | Summarize<br>Brief summary of what was discussed during session and remind participant of their goal                                                                                          | 1 min   |
| 7 | Schedule next session<br>Schedule next session and thank participant for their time                                                                                                           | 1 min   |

Encourage participant to keep the same behavioral goal until the goal is achieved.

## Nurse Cardiovascular Risk Factor Education Session Topics

### Diabetes Education Sessions

- Understanding Your Diabetes
- Medication management/Sick Day
- Monitoring blood sugar
- Eye care/Foot Care
- Exercise and Diabetes

### Hypertension Education Sessions

- Understanding Hypertension
- Medication Adherence

## Intervention Adaptations and Strategies for Persons with Serious Mental Illness

| Intervention Component | Adaptations and Strategies for Persons with Serious Mental Illness                                                                                                                                                                                                                                                                                                                                |
|------------------------|---------------------------------------------------------------------------------------------------------------------------------------------------------------------------------------------------------------------------------------------------------------------------------------------------------------------------------------------------------------------------------------------------|
| Health Coach Sessions  | <ul style="list-style-type: none"> <li>-Meet frequently</li> <li>-Concentrate on key modifiable dietary behaviors</li> <li>-Allow for individualized cognitive tailoring as needed</li> <li>-Address risk factors either sequentially or simultaneously based on readiness, attention and psychiatric symptoms</li> <li>-Guide participants toward a personalized high impact behavior</li> </ul> |
| Environmental Prompts  | <ul style="list-style-type: none"> <li>-Refrigerator magnets, preprinted grocery lists, watches, water bottle, measuring cups, portion plates, lunch bags</li> <li>-Card with high impact individualized behavioral goal(s)</li> </ul>                                                                                                                                                            |
| Contingency Management | -Participation rewarded with points that could be traded for varying levels of gifts relative to the number of sessions attended and decreasing CO <sub>2</sub> measurements                                                                                                                                                                                                                      |
| Self-monitoring        | -Simplified tools - pack wraps for smokers, dietary tracker, pedometers                                                                                                                                                                                                                                                                                                                           |
| Nurse Sessions         | -Repetition, simplified medical information, advocate for participants with physicians while honoring their autonomy, engage social supports and coordinate with mental health program staff to reinforce goals                                                                                                                                                                                   |

## Care Coordination/Care Management Approach by Risk Factor

| Risk Factor         | Care Coordination/Management Approach                                                                                                                                                                                                                                                |
|---------------------|--------------------------------------------------------------------------------------------------------------------------------------------------------------------------------------------------------------------------------------------------------------------------------------|
| Diabetes            | <ul style="list-style-type: none"> <li>-Regularly monitor blood glucose</li> <li>-Communicate with physician about medications</li> <li>-Coordinate with mental health program staff and caregivers around medication adherence, supply procurement, and appropriate diet</li> </ul> |
| Dyslipidemia        | <ul style="list-style-type: none"> <li>-Advocate for and facilitate routine lipid monitoring</li> <li>-Communicate with PCPs around guideline-concordant treatment with lipid lowering medications</li> </ul>                                                                        |
| Hypertension        | <ul style="list-style-type: none"> <li>-Routinely measure blood pressure</li> <li>-Communicate with PCPs around guideline-concordant treatment with antihypertensive medications</li> </ul>                                                                                          |
| Overweight/Obesity  | -Emphasize role of weight loss for CVD risk management                                                                                                                                                                                                                               |
| Unhealthy diet      | -Emphasize role of diet for CVD risk management                                                                                                                                                                                                                                      |
| Physical inactivity | -Emphasize role of exercise for CVD risk management                                                                                                                                                                                                                                  |
| Smoking             | <ul style="list-style-type: none"> <li>-Communicate with physician about pharmacotherapy</li> <li>-Coordinate with mental health program staff and caregivers to support quitting</li> </ul>                                                                                         |

## **Dietary Discussion Topics by Risk Factor**

### Diabetes

- Avoid Sugar Drinks
- Avoid Sweets
- Eat Vegetables and Whole Fruits Instead of Unhealthy Foods
- Eat Smart Portions

### Blood Pressure

- Avoid Salty/Greasy Foods
- Avoid Processed Foods
- Eat Vegetables and Whole Fruits Instead of Unhealthy Foods
- Eat Smart Portions

### Cholesterol

- Avoid Processed Foods
- Avoid Salty/Greasy Foods
- Avoid Sweets
- Eat Vegetables and Whole Fruits Instead of Unhealthy Foods
- Eat Smart Portions

### Weight

- Avoid Sugar Drinks
- Avoid Sweets
- Avoid Salty/Greasy Foods
- Avoid Processed Foods
- Eat Vegetables and Whole Fruits Instead of Unhealthy Foods
- Eat Smart Portions

### Diabetes and Blood Pressure

- Avoid Sugar Drinks
- Avoid Sweets
- Avoid Salty/Greasy Foods
- Avoid Processed Foods
- Eat Vegetables and Whole Fruits Instead of Unhealthy Foods
- Eat Smart Portions

### Diabetes and Cholesterol

- Avoid Processed Foods
- Avoid Salty/Greasy Foods
- Avoid Sweets
- Avoid Sugar Drinks
- Eat Vegetables and Whole Fruits Instead of Unhealthy Foods
- Eat Smart Portions

### Blood Pressure and Cholesterol

- Avoid Processed Foods
- Avoid Salty/Greasy Foods
- Avoid Sweets
- Eat Vegetables and Whole Fruits Instead of Unhealthy Foods
- Eat Smart Portions

Diabetes, Blood Pressure, and Cholesterol

- Avoid Sugar Drinks
- Avoid Sweets
- Avoid Salty/Greasy Foods
- Avoid Processed Foods
- Eat Vegetables and Whole Fruits Instead of Unhealthy Foods
- Eat Smart Portions

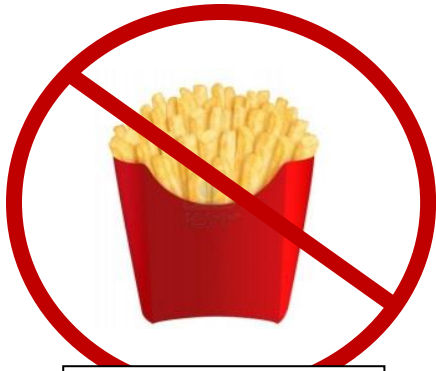

**No Salty/Greasy Foods**

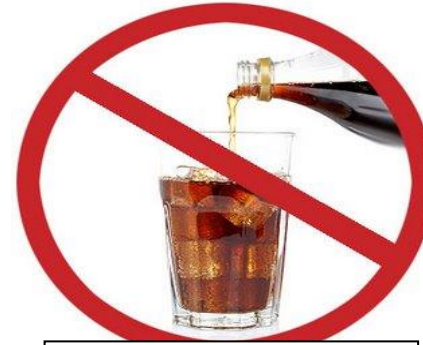

**No Sugar Drinks**

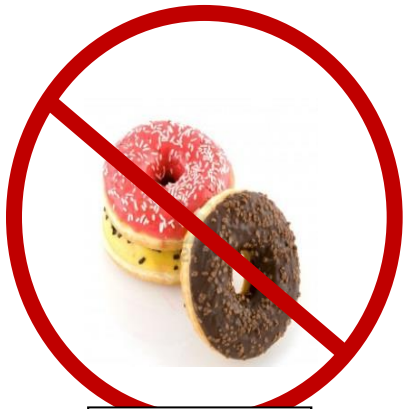

**No Sweets**

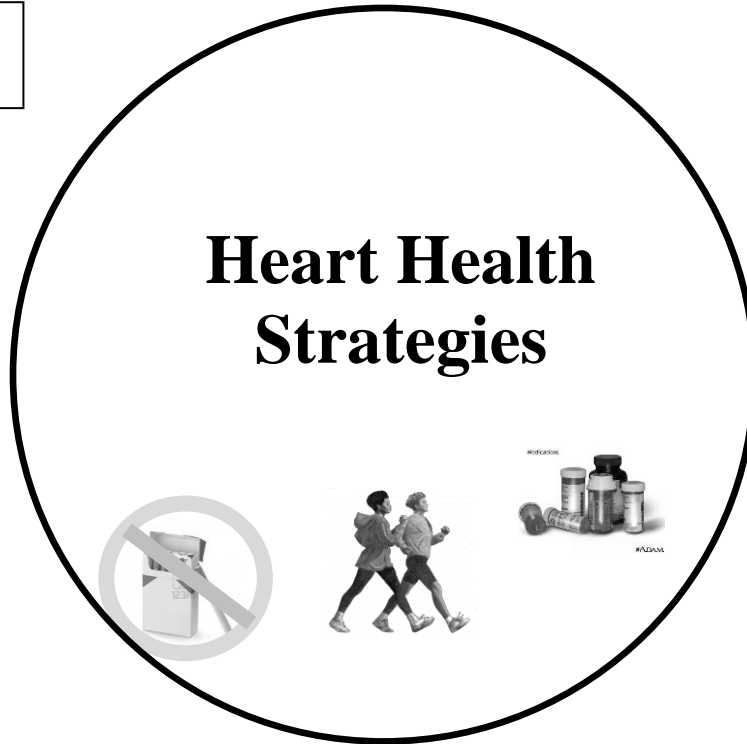

# Heart Health Strategies

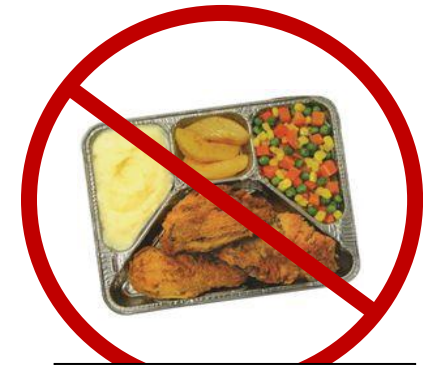

**Avoid Processed Foods**

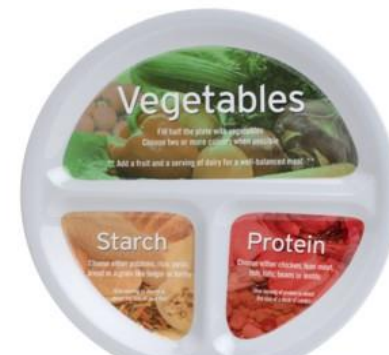

**Eat Smart Portions**

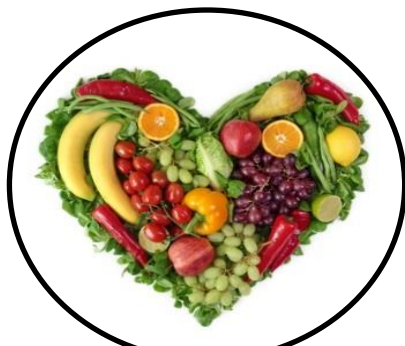

**Eat More Fruits and Vegetables**

To identify focus of sessions with participants with diabetes, high blood pressure, and high cholesterol

Name: \_\_\_\_\_

Week of: \_\_\_\_\_

## IDEAL Tracker

| DAY                           | MON          | TUE          | WED          | THU          | FRI          | SAT          | SUN          |
|-------------------------------|--------------|--------------|--------------|--------------|--------------|--------------|--------------|
| <b>Did you AVOID:</b>         |              |              |              |              |              |              |              |
| <b>Sugar Drinks</b>           | Yes No       | Yes No       | Yes No       | Yes No       | Yes No       | Yes No       | Yes No       |
| <b>Salty/Greasy Foods</b>     | Yes No       | Yes No       | Yes No       | Yes No       | Yes No       | Yes No       | Yes No       |
| <b>Sweets</b>                 | Yes No       | Yes No       | Yes No       | Yes No       | Yes No       | Yes No       | Yes No       |
| <b>Processed Foods</b>        | Yes No       | Yes No       | Yes No       | Yes No       | Yes No       | Yes No       | Yes No       |
| <b>Did you EAT:</b>           |              |              |              |              |              |              |              |
| <b>5 Fruits &amp; Veggies</b> | 1 2 3<br>4 5 | 1 2 3<br>4 5 | 1 2 3<br>4 5 | 1 2 3<br>4 5 | 1 2 3<br>4 5 | 1 2 3<br>4 5 | 1 2 3<br>4 5 |
| <b>Smart Portions</b>         | Yes No       | Yes No       | Yes No       | Yes No       | Yes No       | Yes No       | Yes No       |
| <b>Did you EXERCISE?</b>      |              |              |              |              |              |              |              |
|                               | Yes No       | Yes No       | Yes No       | Yes No       | Yes No       | Yes No       | Yes No       |

Weight: \_\_\_\_\_ lbs



**eTable 1. Trial Enrollment Criteria**

| <b>Inclusion criteria</b>                                                                                                                                                                                                                                                                                                                                                                                           |
|---------------------------------------------------------------------------------------------------------------------------------------------------------------------------------------------------------------------------------------------------------------------------------------------------------------------------------------------------------------------------------------------------------------------|
| ▪ Age 18 years and older                                                                                                                                                                                                                                                                                                                                                                                            |
| ▪ Body mass index at least 25 kg/m <sup>2</sup> or one of the following CVD risk factors:<br>-Hypertension (SBP≥ 140mmHg or DBP≥ 90mmHg or on antihypertensive medications;<br>-Diabetes mellitus (fasting blood sugar> 125mg/dl or hemoglobin A1c>6.5 or on a hypoglycemic medication);<br>-Dyslipidemia (LDL >130 mg/dl, HDL<40, total cholesterol ≥200 or on a lipid lowering agent);<br>-Current tobacco smoker |
| ▪ Able and willing to give informed consent                                                                                                                                                                                                                                                                                                                                                                         |
| ▪ Completion of baseline data collection                                                                                                                                                                                                                                                                                                                                                                            |
| ▪ Willing to accept randomization                                                                                                                                                                                                                                                                                                                                                                                   |
| ▪ Willing to participate in the intervention                                                                                                                                                                                                                                                                                                                                                                        |
|                                                                                                                                                                                                                                                                                                                                                                                                                     |
| <b>Exclusion criteria</b>                                                                                                                                                                                                                                                                                                                                                                                           |
| ▪ Cardiovascular event (unstable angina, myocardial infarction) within the past 6 months                                                                                                                                                                                                                                                                                                                            |
| ▪ Serious medical condition which either limits life expectancy or requires active management (e.g., certain cancers)                                                                                                                                                                                                                                                                                               |
| ▪ Condition which interferes with outcome measurement (e.g., dialysis)                                                                                                                                                                                                                                                                                                                                              |
| ▪ Pregnant or planning a pregnancy during study period. Nursing mothers would need approval from physician.                                                                                                                                                                                                                                                                                                         |
| ▪ Alcohol or substance use disorder if not sober/abstinent for 30 days                                                                                                                                                                                                                                                                                                                                              |
| ▪ Planning to leave rehabilitation center or clinic within 6 months or move out of geographic area within 18 months                                                                                                                                                                                                                                                                                                 |
| ▪ Investigator judgment (e.g., for concerns about participant or staff safety)                                                                                                                                                                                                                                                                                                                                      |

**eTable 2. Global Framingham Risk Score by Randomized Group at Each Visit (Cross-Sectional) and Model-Based Percent Longitudinal Change of Global Framingham Risk Score Over Time (corresponds to Figure 2 in text)**

| Global Framingham Risk Score | Intervention Group  | Control Group   | Intervention Group vs. Control |
|------------------------------|---------------------|-----------------|--------------------------------|
| Baseline, n                  | 132                 | 137             |                                |
| Mean                         | 11.5 ± 11.5         | 12.7 ± 12.7     |                                |
| Median                       | 8.6 (3.9-16.0)      | 9.1 (4.0-16.7)  |                                |
| 6-month, n                   | 123                 | 126             |                                |
| Mean                         | 11.5 ± 12.3         | 12.5 ± 12.4     |                                |
| Median                       | 7.9 (3.3-14.3)      | 9.4 (3.4-17.5)  |                                |
| 18-month, n                  | 124                 | 132             |                                |
| Mean                         | 9.9 ± 10.2          | 12.3 ± 12.0     |                                |
| Median                       | 7.7 (3.1 -12.0)     | 9.7 (4.0-15.9)  |                                |
| % change baseline to 6 mo.   | -6.9 [-12.9, -0.8]  | 0.5 [-5.4, 6.5] |                                |
| % change baseline to 18 mo.  | -11.2 [-18.5, -3.9] | 1.4 [-5.7, 8.6] | -12.7 [-22.9, -2.5]            |

The global Framingham Risk Score reflects the 10-year probability of a cardiovascular event. Mean global Framingham Risk Score (± SD) and median, (Q1-Q3) ranges were calculated with cross-sectional data based on data available for the corresponding visit. N for intervention group at baseline is 132, 6 months is 123, 18 months is 124, N for control group at baseline is 137, 6 months is 126, 18 months is 132. Percentage changes reported are mean estimates and 95% CI derived from mixed-effects repeated measures analysis and correspond to Figure 2. The mixed-effects repeated measures analysis used all available data from all randomized participants, accounting for missing data based on missing at random mechanism.

**eFigure 1. Percent Change in ACC/AHA Risk Score Over Time According to Study Group**

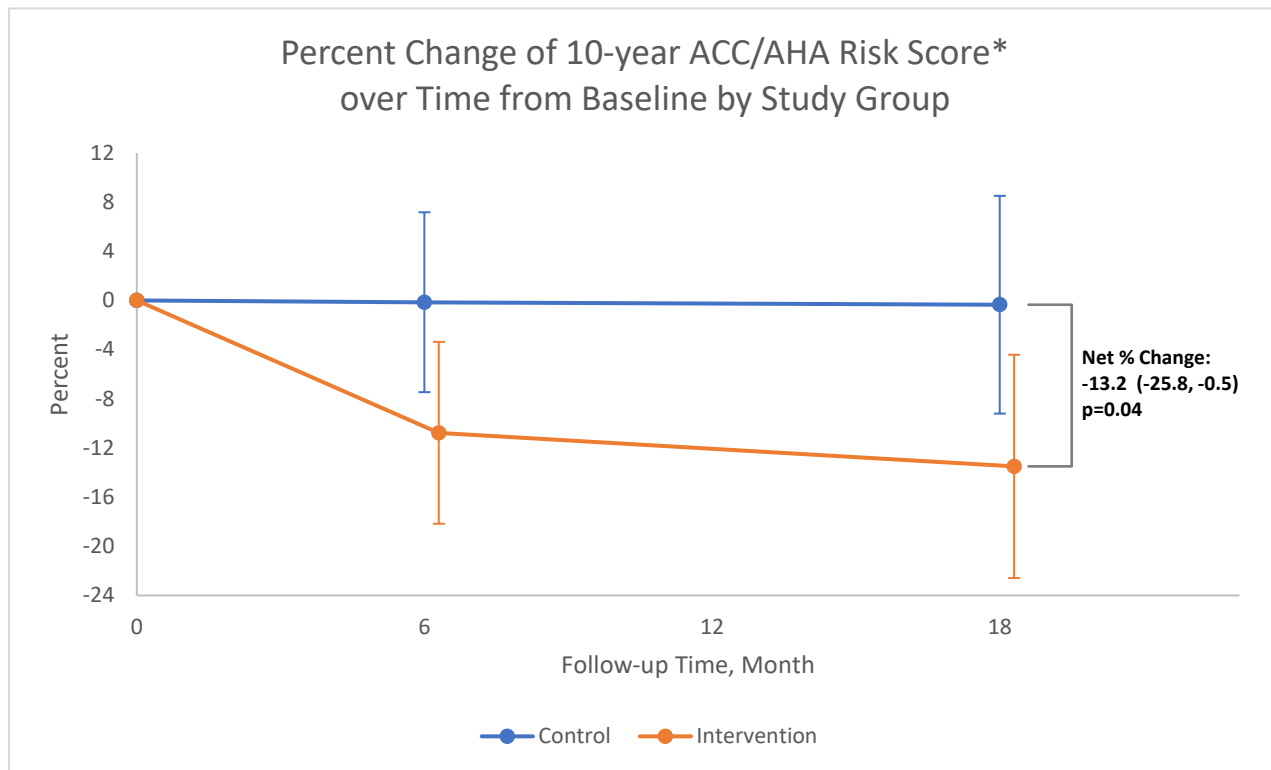

**eTable 3. ACC/AHA Risk Score by Randomized Group at Each Visit and Model-Based Percent Longitudinal Change of ACC/AHA Risk Score Over Time (corresponds to eFigure 1.)**

| ACC/AHA Risk Score          | Intervention Group  | Control Group    | Intervention Group vs. Control Group |
|-----------------------------|---------------------|------------------|--------------------------------------|
| Baseline, n                 | 132                 | 137              |                                      |
| Mean                        | 7.9 ± 7.8           | 9.4 ± 9.0        |                                      |
| Median                      | 5.0 (1.9-11.9)      | 6.6 (2.7-12.5)   |                                      |
| 6-month, n                  | 123                 | 126              |                                      |
| Mean                        | 7.7 ± 8.0           | 9.3 ± 9.3        |                                      |
| Median                      | 4.9 (1.5-11.7)      | 6.9 (2.6-13.1)   |                                      |
| 18-month, n                 | 124                 | 132              |                                      |
| Mean                        | 7.0 ± 8.0           | 9.6 ± 10.4       |                                      |
| Median                      | 4.9 (1.6-8.6)       | 6.1 (3.0-12.7)   |                                      |
| % change baseline to 6 mo.  | -10.8 [-18.2, -3.4] | -0.1 [-7.5, 7.2] | -10.6 [-21.0, -0.2]                  |
| % change baseline to 18 mo. | -13.5 [-22.6, -4.4] | -0.3 [-9.2, 8.5] | -13.2 [-25.8, -0.5]                  |

The AHA/ACC Risk Score reflects the 10-year probability of a cardiovascular event. Mean AHA/ACC Risk Score (± SD) and median, (Q1-Q3) ranges were calculated with cross-sectional data based on data available for the corresponding visit. N for intervention group at baseline is 132, 6 months is 123, 18 months is 124, N for control group at baseline is 137, 6 months is 126, 18 months is 132. % Changes reported are mean estimates and 95% CI derived from mixed-effects repeated measures analysis and correspond to eFigure 1. The mixed-effects repeated measures analysis used all available data from all randomized participants, accounting for missing data based on missing at random mechanism.

**eFigure 2. Model-Based Percent Change in Global Framingham Risk Score by Subgroups of Sex, Race, Cardiovascular Risk at Baseline, and Psychiatric Diagnosis**

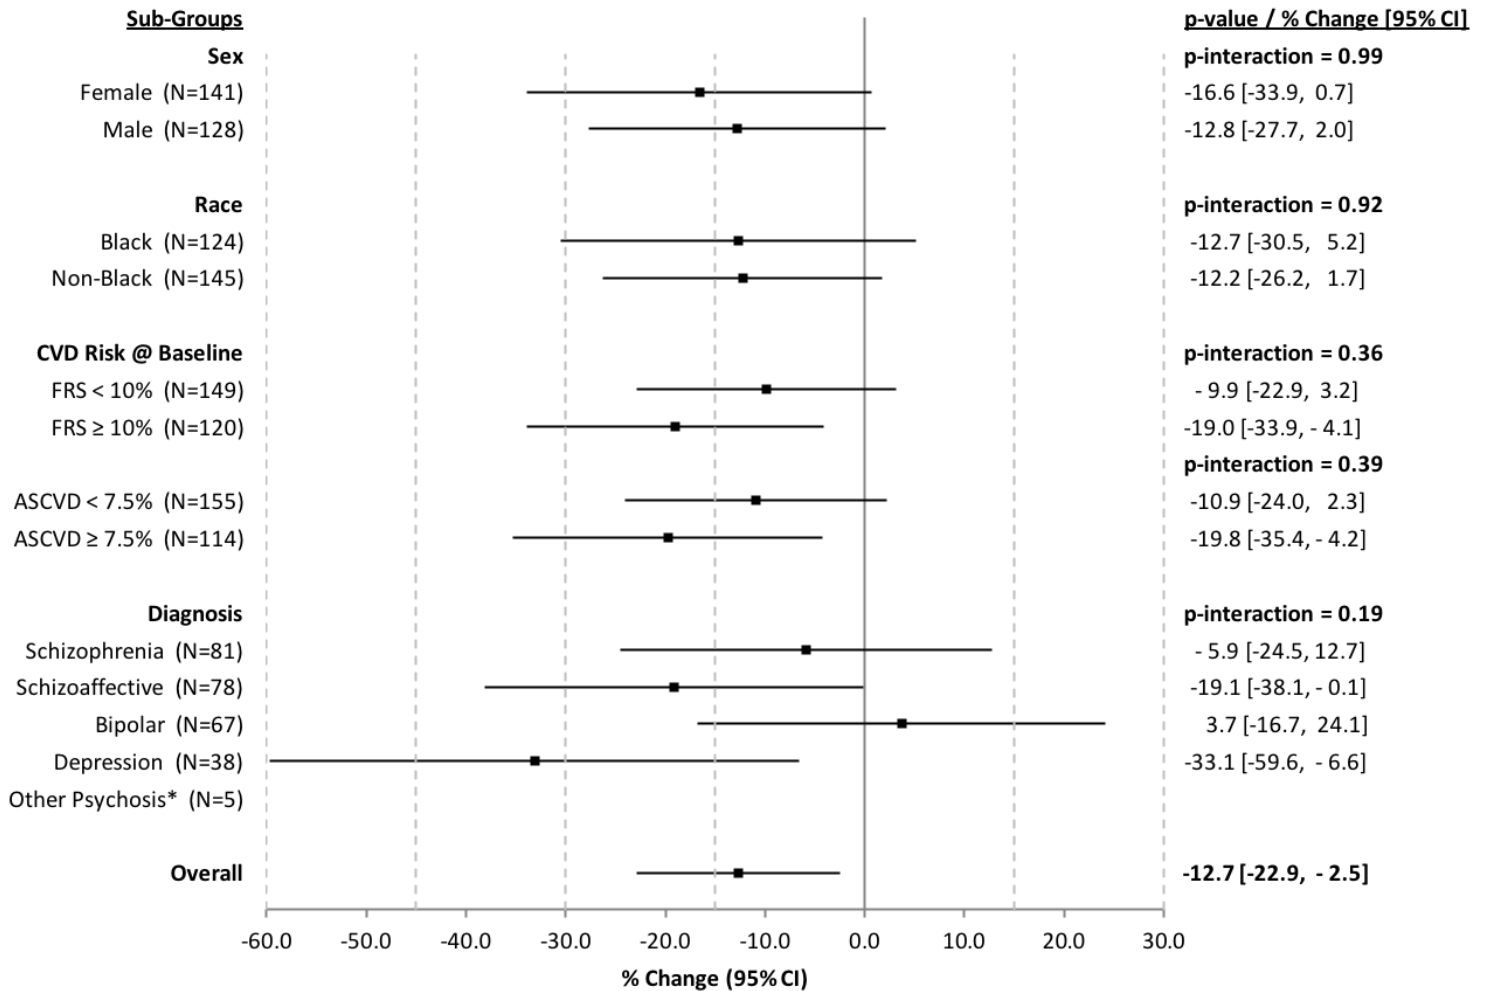

\*Small sub-group (N=5), estimates are not displayed

Estimates are derived from mixed-effects repeated measures analysis using all available data from all randomized participants. ASCVD refers to the ACC/AHA risk score.

**eTable 4. Overnight Hospitalizations, Deaths and Medical Events for Intervention and Control Participants.**

**4a. Overnight Hospitalizations**

|                              | Intervention           |                  | Control                |                  |
|------------------------------|------------------------|------------------|------------------------|------------------|
|                              | Number of participants | Number of events | Number of participants | Number of events |
| Medical hospitalizations     | 20                     | 22               | 30                     | 41               |
| Psychiatric hospitalizations | 10                     | 14               | 9                      | 13               |
| Total hospitalizations       | 29                     | 36               | 35                     | 54               |

Overnight hospitalization data are from standard data collection visits.

**4b. Deaths**

|        | Intervention                                 | Control                              |
|--------|----------------------------------------------|--------------------------------------|
| Deaths | 1 unknown reason<br>1 presumed cardiac death | 1 unknown reason<br>1 cardiac arrest |
| Total  | 2                                            | 2                                    |

**4c. Medical Events**

|                                   | Intervention | Control |
|-----------------------------------|--------------|---------|
| <u>Cardiovascular</u>             |              |         |
| Heart Attack & PTCA               | 1            | 0       |
| PTCA                              | 0            | 1       |
| Arrhythmia                        | 1            | 0       |
| Pacemaker / ICD device            | 1            | 0       |
| Lower extremity bypass surgery    | 0            | 1       |
| TIA                               | 0            | 1       |
| Stroke                            | 0            | 1       |
| Hypertension                      | 0            | 1       |
| Hypotension                       | 1            | 0       |
| DVT                               | 1            | 0       |
| Edema                             | 0            | 1       |
| Total                             | 5            | 6       |
| <u>Diabetes mellitus</u>          |              |         |
| Hypoglycemia                      | 0            | 1       |
| Hyperglycemia                     | 0            | 1       |
| Total                             | 0            | 2       |
| <u>Orthopedic/Musculoskeletal</u> |              |         |
| Hip surgery                       | 0            | 2       |
| Back surgery                      | 1            | 2       |
|                                   | Intervention | Control |
| Total                             | 1            | 4       |

|                             |    |    |
|-----------------------------|----|----|
| <u>Gastrointestinal</u>     |    |    |
| Bowel Obstruction           | 1  | 1  |
| Stomach Surgery             | 0  | 1  |
| Pancreatitis                | 0  | 1  |
| Hyponatremia/Dehydration    | 2  | 1  |
| Other Gastrointestinal      | 3  | 3  |
| Total                       | 6  | 7  |
|                             |    |    |
| <u>Respiratory</u>          |    |    |
| COPD                        | 0  | 2  |
| Pneumonia                   | 1  | 5  |
| Respiratory distress        | 0  | 1  |
| Respiratory failure         | 0  | 1  |
| Difficulty breathing        | 2  | 1  |
| Bronchitis                  | 2  | 1  |
| Total                       | 5  | 11 |
|                             |    |    |
| <u>Neurological</u>         |    |    |
| Concussion                  | 0  | 1  |
| Seizure                     | 0  | 1  |
| Tremors                     | 1  | 0  |
| Total                       | 1  | 2  |
|                             |    |    |
| <u>Other Medical Events</u> |    |    |
| Skin infection              | 1  | 0  |
| Viral infection             | 0  | 1  |
| Tonsillectomy               | 0  | 1  |
| Thyroidectomy               | 0  | 1  |
| Urinary surgery             | 0  | 1  |
| Post-surgical bleeding      | 0  | 2  |
| Cancer                      | 1  | 0  |
| Ear pain                    | 1  | 0  |
| Fall                        | 1  | 3  |
| Total                       | 4  | 9  |
|                             |    |    |
|                             |    |    |
| Overall Total               | 22 | 41 |

Medical event data are from standard data collection visits.
