# Supplementary material for: Effect of a Comprehensive Cardiovascular Risk Reduction Intervention in Persons With Serious Mental Illness: A Randomized Clinical Trial
Source: PubMed Central journal article supplement (PMC7293000; doi:10.1001/jamanetworkopen.2020.7247), 2020-06-12
Supplement: jamanetwopen-3-e207247-s003.pdf [file jamanetwopen-3-e207247-s003.pdf]

# Data Sharing Statement

Daumit. Effect of a Comprehensive Cardiovascular Risk Reduction Intervention in Persons With Serious Mental Illness. *JAMA Netw Open*. Published June 12, 2020. 10.1001/jamanetworkopen.2020.7247

## Data

**Data available:** Yes

**Data types:** Deidentified participant data, Data dictionary

**How to access data:** [gdaumit@jhmi.edu](mailto:gdaumit@jhmi.edu)

**When available:** beginning date: 03-01-2021

## Supporting Documents

**Document types:** None

## Additional Information

**Who can access the data:** Researchers who proposed use of the data has been approved

**Types of analyses:** for research

**Mechanisms of data availability:** with a signed data access agreement and IRB approval
